# Supplementary material
Source: ML conference proceedings conference paper supplement (https://openaccess.thecvf.com/content/WACV2023/html/Niklaus_Splatting-Based_Synthesis_for_WACV_2023_paper.html)
Supplement: Supplementary file 3 [file Niklaus_Splatting-Based_Synthesis_for_WACV_2023_supplemental.zip]

Archive with 10 entries (10 files):
- 4k.mp4
- 4k.txt
- failure.mp4
- failure.txt
- faq.pdf
- related.pdf
- sidebyside.mp4
- sidebyside.txt
- visualization.mp4
- visualization.txt
