# Supplementary material
Source: ML conference proceedings conference paper supplement (https://openaccess.thecvf.com/content/WACV2023/html/Niklaus_Splatting-Based_Synthesis_for_WACV_2023_paper.html)
Supplement: Supplementary file 3 [file Niklaus_Splatting-Based_Synthesis_for_WACV_2023_supplemental.zip › failure.txt]

Example failure case from XTEST-4K where the underlying motion estimaiton is unable to faithfully recover the inter-frame motion (other methods, like SoftSplat and XVFI, fail on this example as well).
