# Supplementary material
Source: ML conference proceedings conference paper supplement (https://openaccess.thecvf.com/content/WACV2023/html/Niklaus_Splatting-Based_Synthesis_for_WACV_2023_paper.html)
Supplement: Supplementary file 3 [file Niklaus_Splatting-Based_Synthesis_for_WACV_2023_supplemental.zip › sidebyside.txt]

Comparing our approach to SoftSplat using examples from Xiph-2K and XTEST-2K (the results were obtained at a 2K resolution and then downsampled to fit into the full-HD video). The result has been trimmed in length since WACV 2023 imposes a 20 MB supplementary file size limit for the camera ready submission.
