# Supplementary material
Source: ML conference proceedings conference paper supplement (https://openaccess.thecvf.com/content/WACV2023/html/Niklaus_Splatting-Based_Synthesis_for_WACV_2023_paper.html)
Supplement: Supplementary file 3 [file Niklaus_Splatting-Based_Synthesis_for_WACV_2023_supplemental.zip › visualization.txt]

The interactive demo unfortunately had to be removed from the supplementary file since WACV 2023 imposes a 20 MB supplementary file size limit for the camera ready submission. You can still find the interactive demo at http://sniklaus.com/splatsyn though.
